# Supplementary material
Source: PubMed Central journal article supplement (PMC6851419)
Supplement: NIHMS1048339-supplement-Supplementary.pdf [file NIHMS1048339-supplement-Supplementary.pdf]

# Supplementary materials for "Assessment of protein assembly prediction in CASP13"

Dmytro Guzenko, Aleix Lafita, Bohdan Monastyrskyy, Andriy Kryshchak and Jose M. Duarte

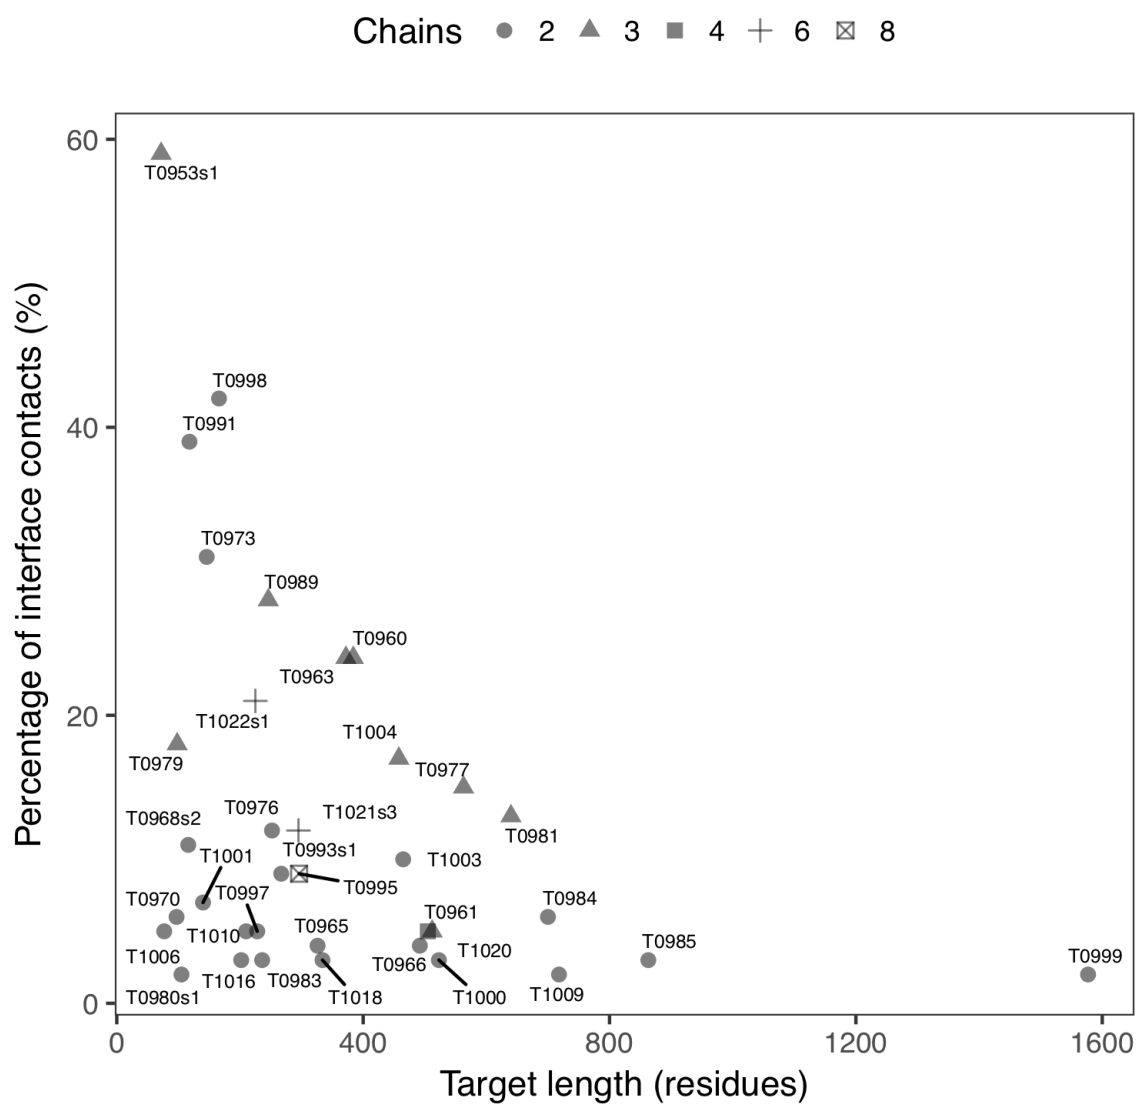

Figure S1: Percentage of homomeric interface contacts in CASP13 targets.

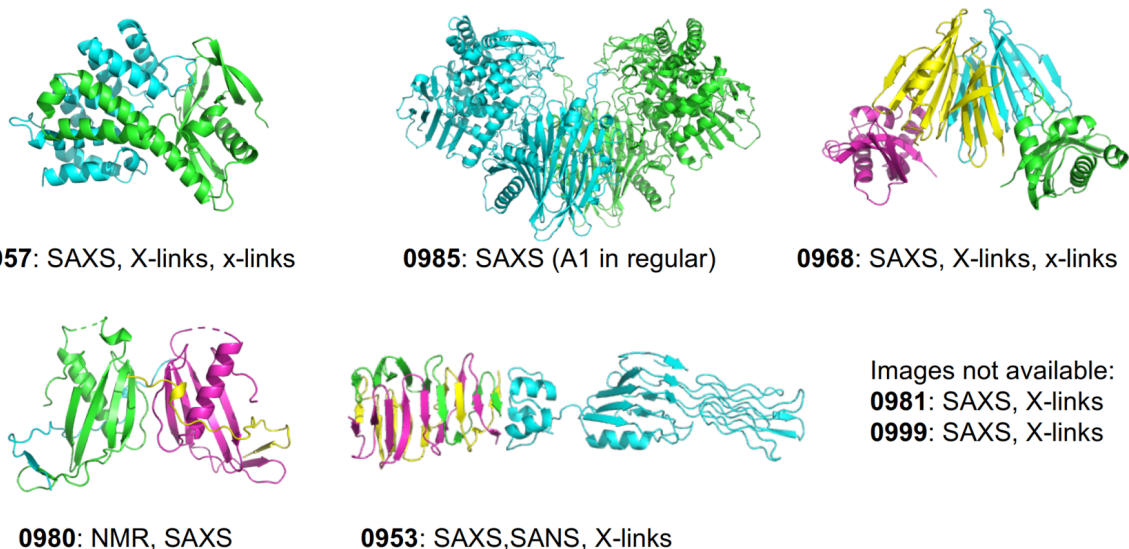

Figure S2: Data-assisted targets.

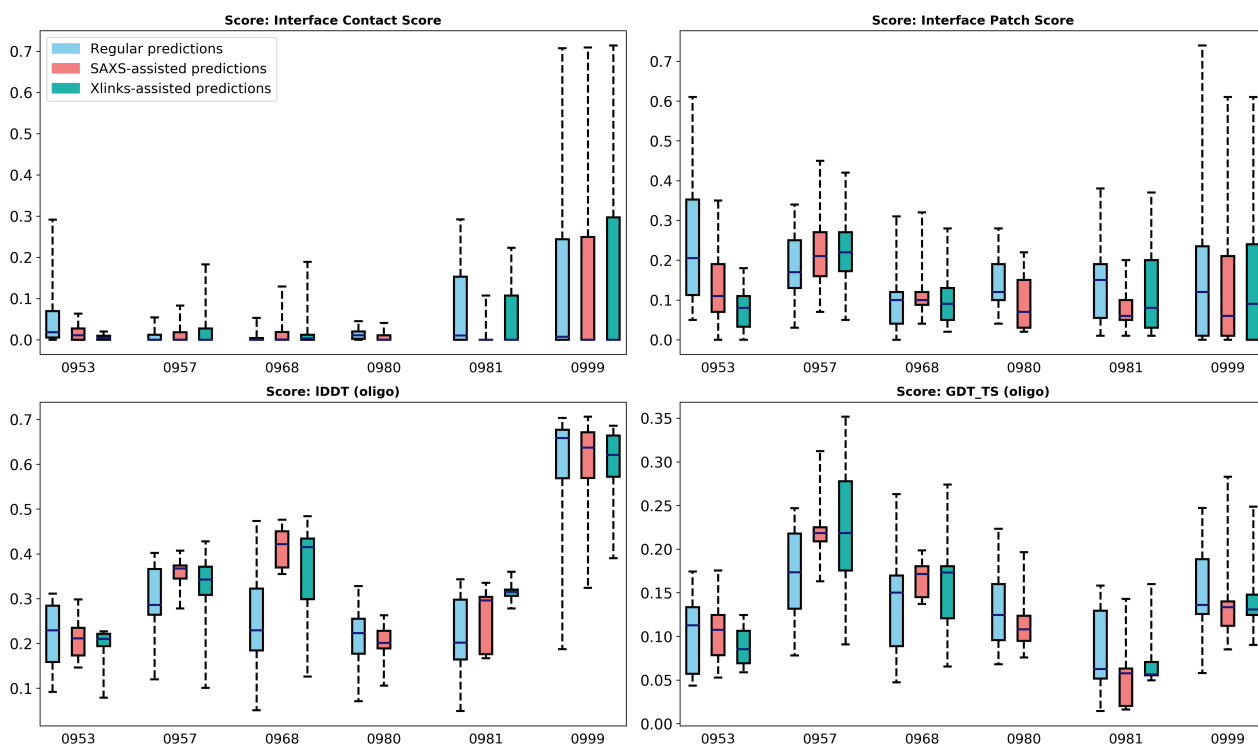

Figure S3: Score distributions for all predictions of data-assisted and the corresponding non-assisted targets. Two types of crosslinks and two types of scattering datasets are merged for the purpose of this figure.

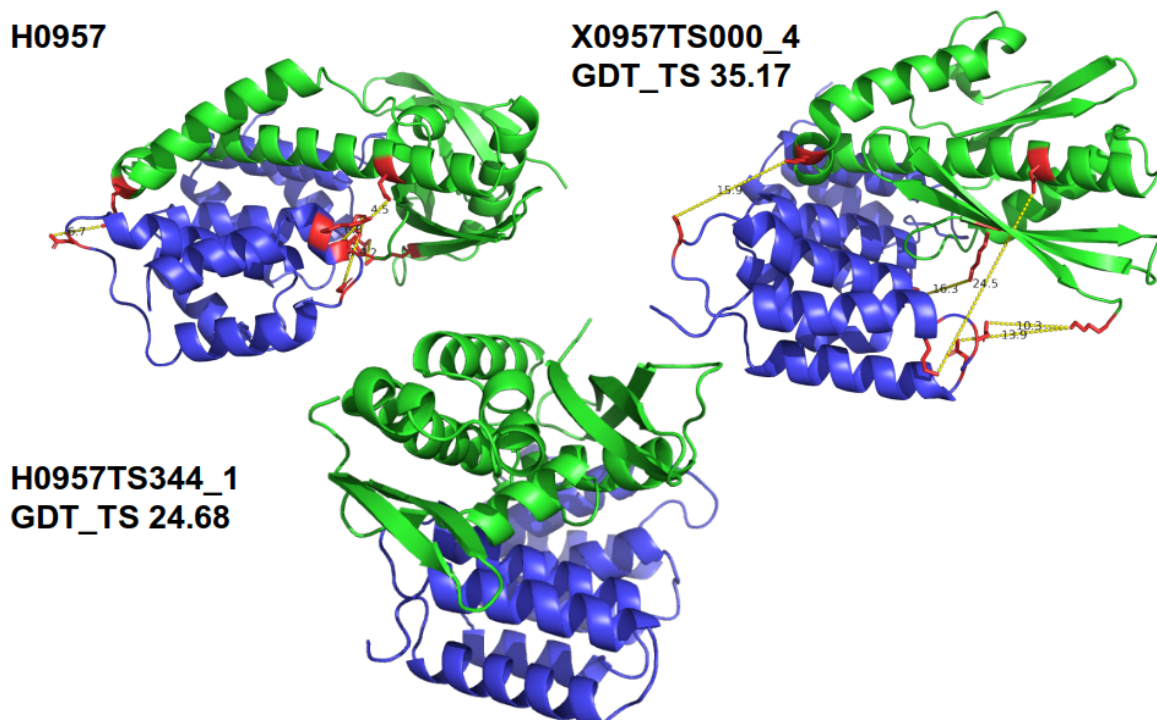

Figure S4: Target X0957 shows improvement across all scores considered due to several fortunate intermolecular crosslinks. Crosslinked residues in the target and the assisted prediction are highlighted in red and connected with a dashed yellow line. Crosslinks between missing residues are not shown. Best regular prediction (bottom) has a significantly lower GDT.
